# Supplementary material
Source: Research Square preprint supplement (doi:10.21203/rs.3.rs-8971516/v1)
Supplement: Supplementary file 1 [file 97af9f0f5ccdff2d43bbc4be.pdf]

# Supplementary Information: Navigating the Quantum Resource Landscape of Entropy Vector Space Using Machine Learning and Optimization

Nothando Khumalo,<sup>1</sup> Aman Mehta,<sup>2</sup> William Munizzi,<sup>1</sup> and Prineha Narang<sup>1,2</sup>

<sup>1</sup>*Division of Physical Sciences, College of Letters and Science, University of California, Los Angeles*

<sup>2</sup>*Department of Electrical and Computer Engineering, University of California, Los Angeles*

## I. ADDITIONAL CIRCUITS AND MAGIC EVOLUTION

Figures 1 and 2 are the circuits corresponding to Violators 2-4 in Section IVB. The Q-Learning algorithm was initialized at the state given by Eq.(36) and evolved until Ingleton violation was reached.

For each circuit in Appendix I that perturbs about a state on the edge of the Ingleton entropy cone, we track the overall magic of the system as the entropy vector is driven out of the Ingleton entropy cone. Figure 3 shows the evolution of  $\mathcal{W}_2$ , the magic witness defined in Eq.(33), across each circuit that prepares a state  $|\psi\rangle_{f_i}$ , beginning from the initial state  $|0\rangle^{\otimes 6}$ . In each circuit, the overall magic of subsystem  $ABCD \subset |\psi\rangle_{f_i}$  increases throughout the evolution, as the system is driven towards Ingleton violation.

## II. EXAMPLES OF INGLETON-VIOLATING STATES

Below we include a few explicitly examples of Ingleton-violating states, with various violation amounts. A significantly larger sample list is publicly available at [1].

Please find the complete codebase, data and all other generated examples of violations at [1]. Additional functions to compute entropy vectors and evaluate entropy inequalities available at [2–4].

- 
- [1] N. Khumalo, A. Mehta, and W. Munizzi, [Quantum Resource Dynamics](https://github.com/nkhumalo/william-s-magic-school), <https://github.com/nkhumalo/william-s-magic-school>.
  - [2] W. Munizzi, [Stabilizer-States](https://github.com/WMunizzi/Stabilizer-States), <https://github.com/WMunizzi/Stabilizer-States> (2022).
  - [3] W. Munizzi, [Cayley-Graphs](https://github.com/WMunizzi/Cayley-Graphs), <https://github.com/WMunizzi/Cayley-Graphs> (2023).
  - [4] J. Fuentes and W. Munizzi, [Mmi-failure-for-graph-states](https://github.com/jesus99222/MMI-Failure-For-Graph-States), <https://github.com/jesus99222/MMI-Failure-For-Graph-States> (2025).

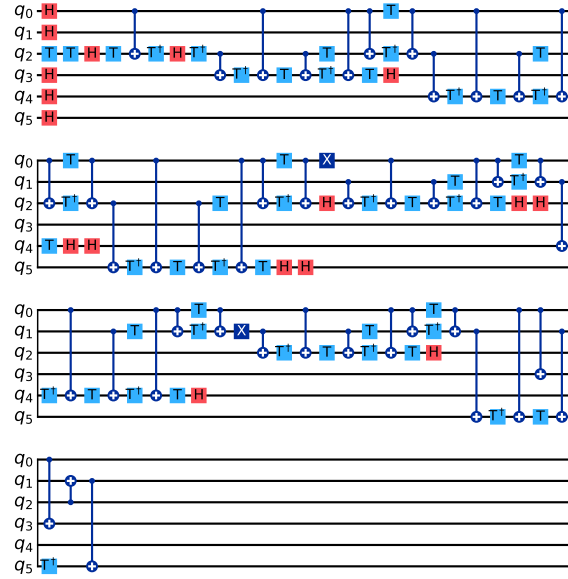

(a) Circuit to prepare violating state 2.

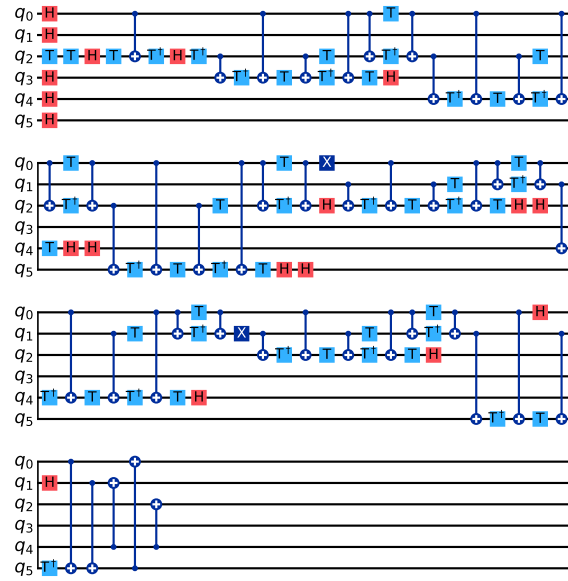

(b) Circuit to prepare violating state 3.

Figure 1: Violating states 2 and 3 found by perturbing Eq.(36) and QL paradigm in Figure (1).

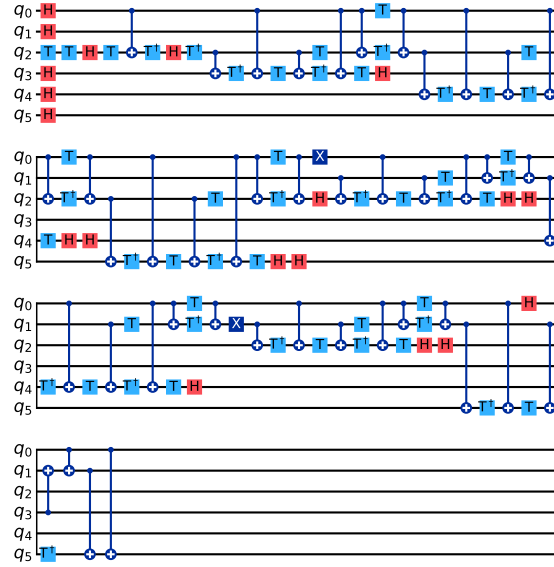

(a) Circuit to prepare violating state 4.

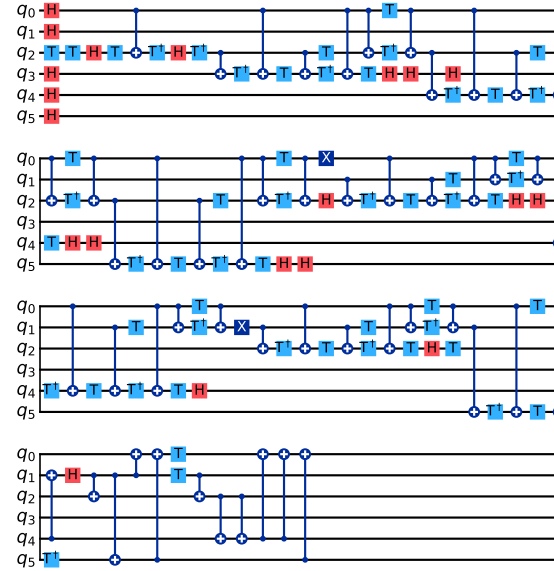

(b) Circuit to prepare violating state 5.

Figure 2: Violating states 4 and 5 found by perturbing Eq.(36) and QL paradigm in Figure (1).

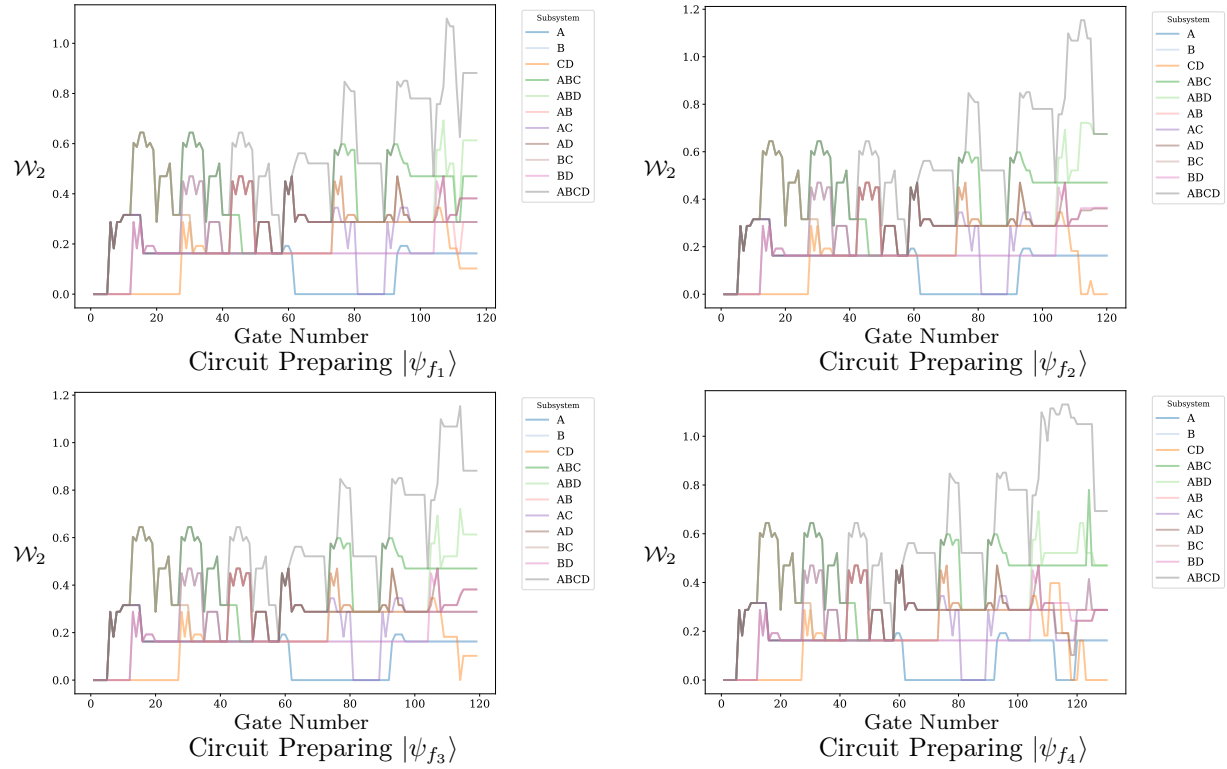

Figure 3: Evolution of the non-local magic witness for mixed states obtained from Ingleton-violating circuits identified via Q-learning-based perturbations of the known violator. In circuits 2 and 4, subsystem CD exhibits a positive  $\mathcal{W}_2$  value at the point of violation, in contrast to the reference (literature) circuit where  $\mathcal{W}_2(CD) = 0$ .
